# Supplementary material
Source: publisher figshare collection journal article supplement (https://frontiersin.figshare.com/ndownloader/files/14036975)
Supplement: Supplementary file 1 [file 14036975]

**Figure S1.** Representative images of habitat categories. Change in urbanization can largely be seen in road density.

Little White Oak Creek

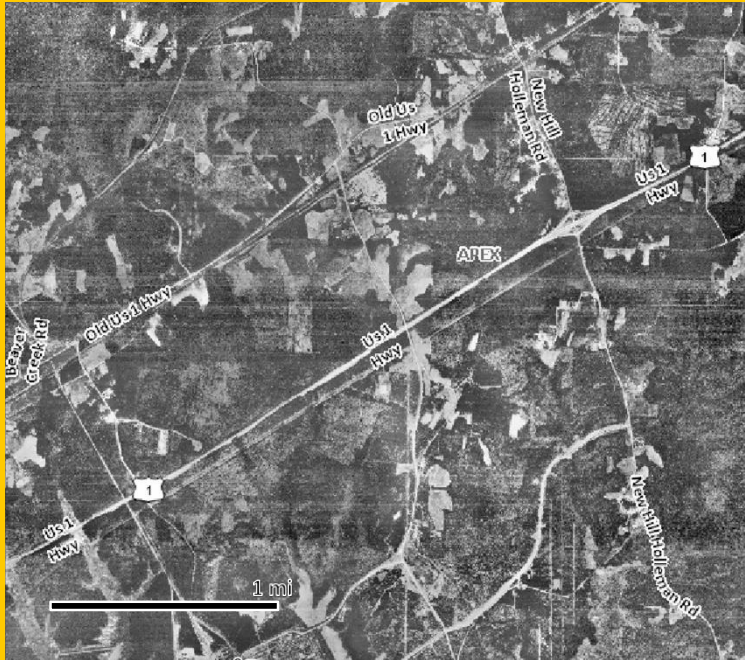

1981

Rural

Little change

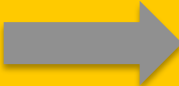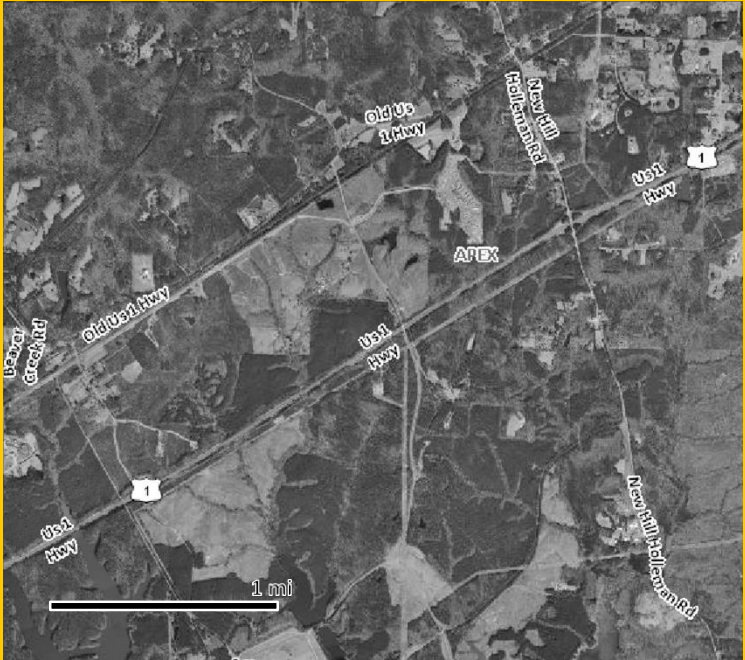

2013

Recently urbanized

Beaver Creek

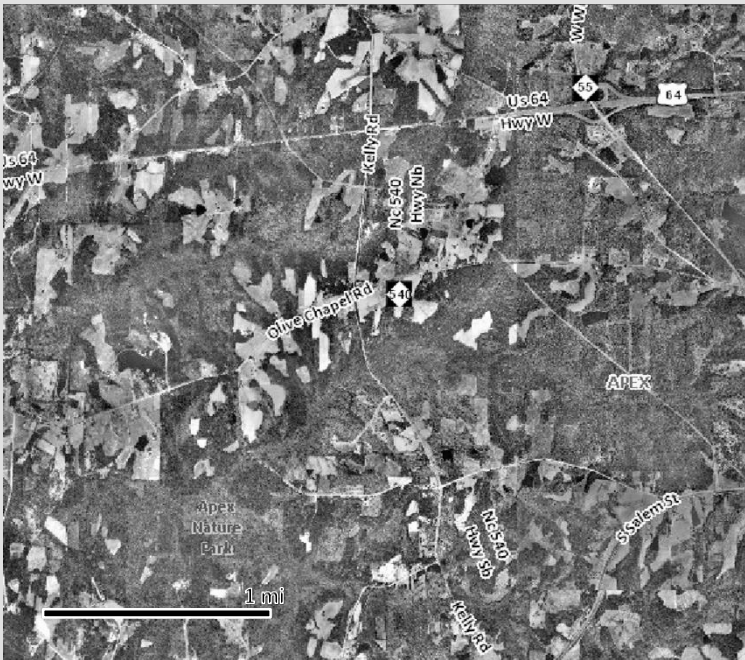

1988

Increasing development

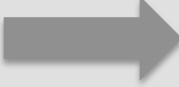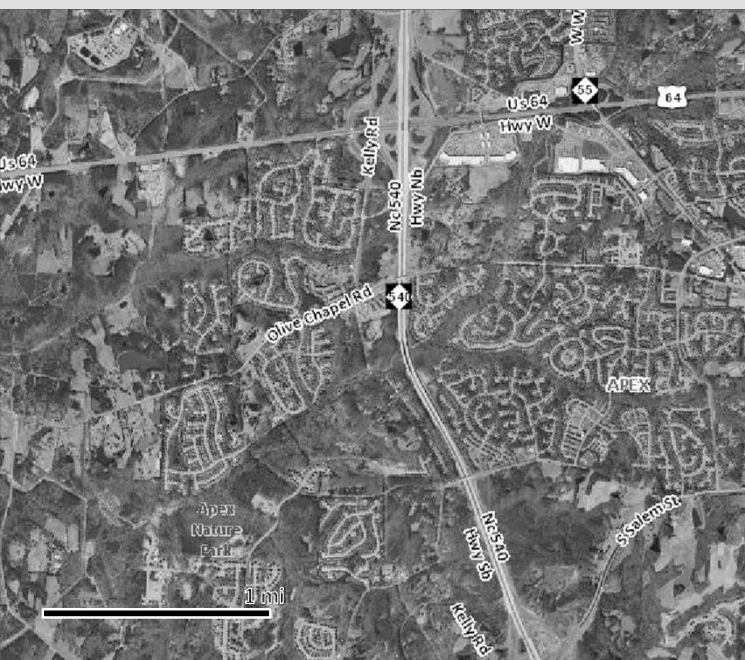

2012

Historically urban

Mine Creek

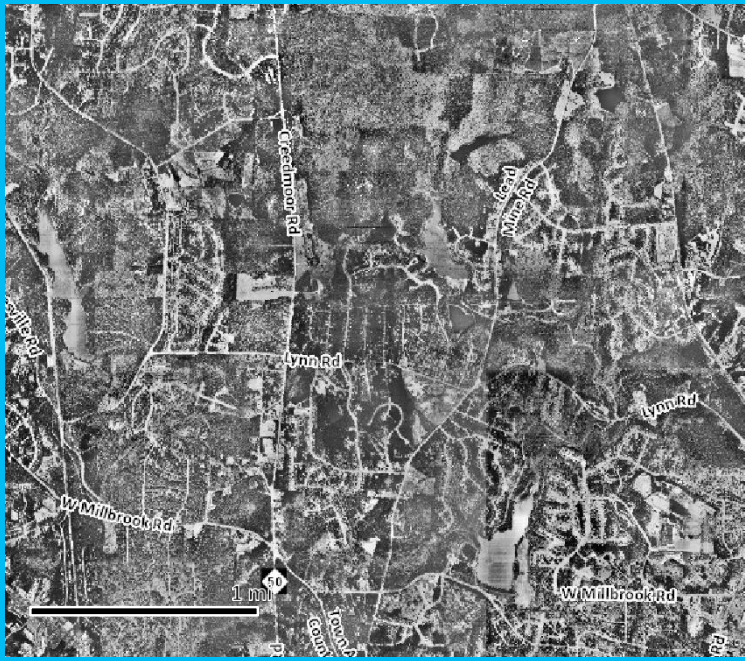

1981

Little change

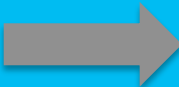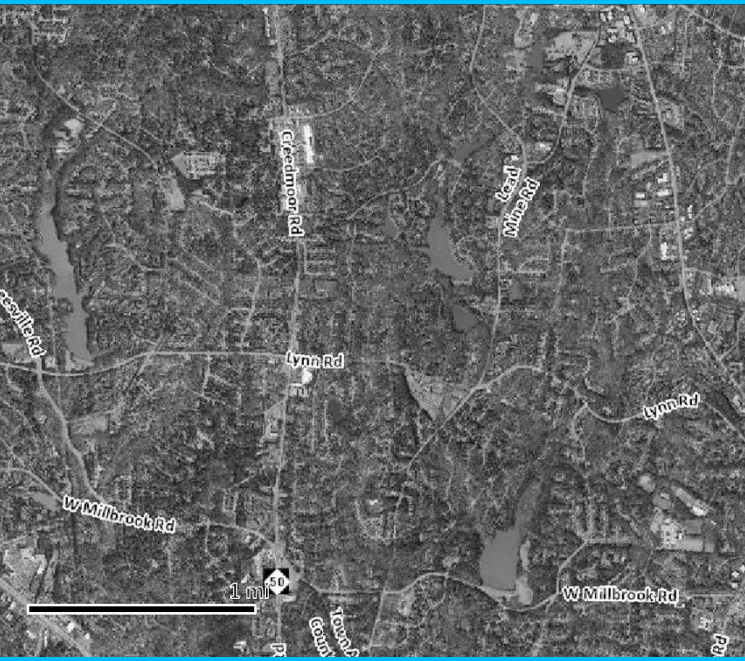

2014
